# Supplementary material for: Resolving deconvolution ambiguity in gene alternative splicing
Source: Springer Nature journal article supplement (doi:10.1186/1471-2105-10-237), 2009-08-04

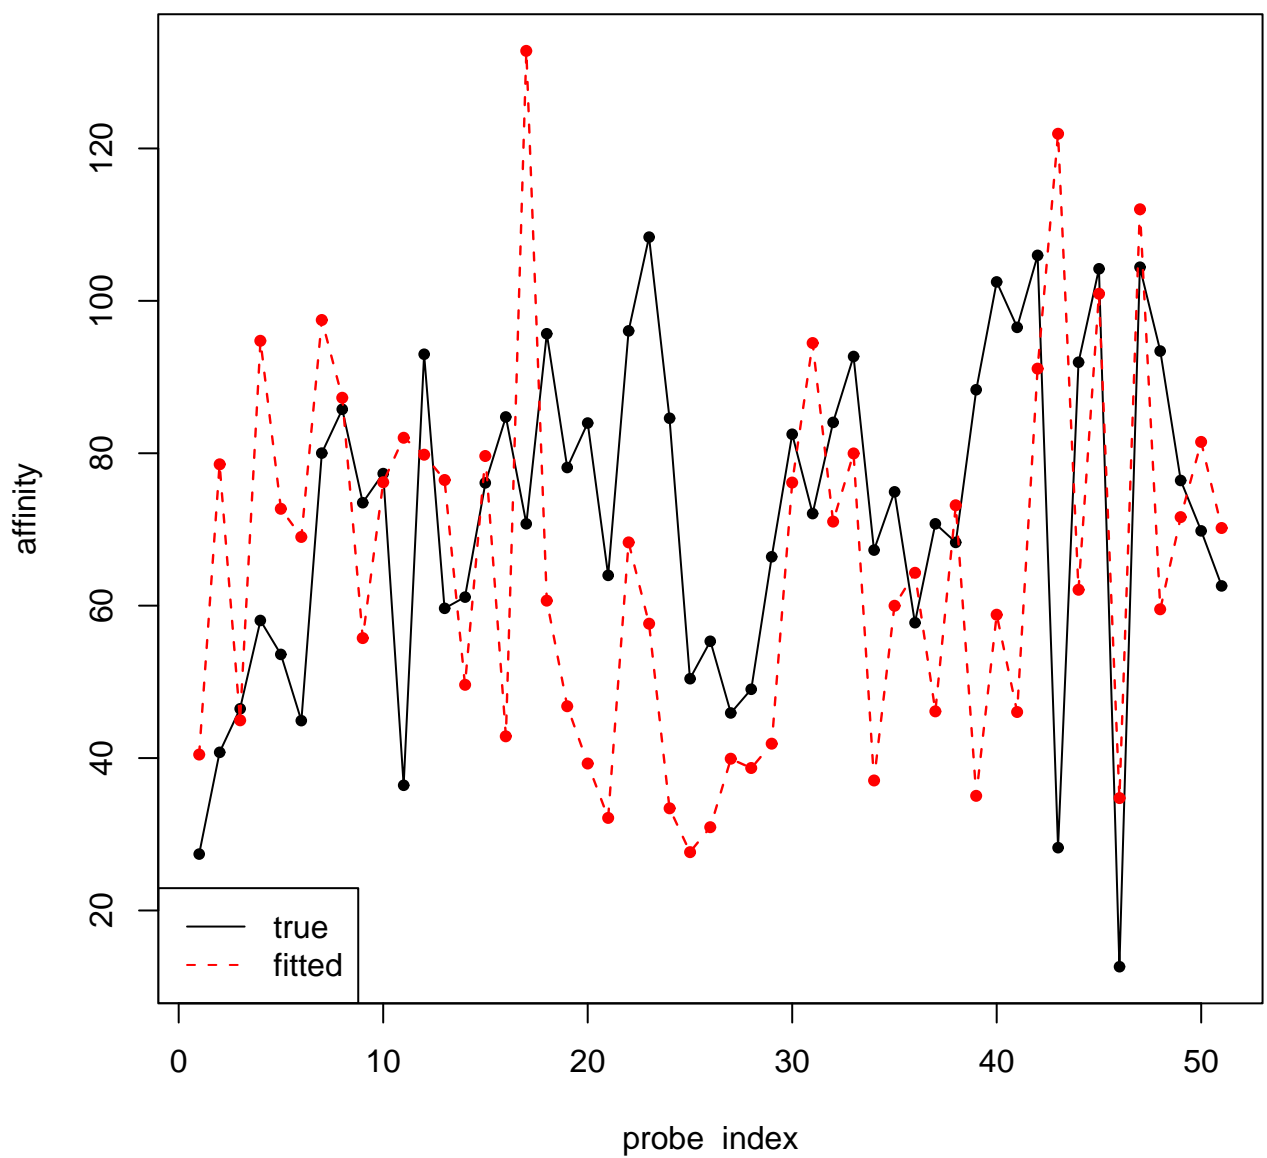

Supplement: 12859_2009_2967_MOESM13_ESM.pdf [file 12859_2009_2967_MOESM13_ESM.pdf]
